# Supplementary material for: CO2reforming of methane over Mg-promoted Ni/SiO2catalysts: the influence of Mg precursors and impregnation sequences
Source: Royal Society of Chemistry journal article supplement (doi:10.1039/c1cy00333j), 2011-12-02
Supplement: c1cy00333j.pdf [file c1cy00333j.pdf]

Electronic Supplementary Information

**CO<sub>2</sub> reforming of methane over Mg-promoted Ni/SiO<sub>2</sub> catalysts: the influence of Mg  
precursor and impregnation sequence**

Jianqiang Zhu, Xiaoxi Peng, Lu Yao, Dongmei Tong and Changwei Hu\*

Key Laboratory of Green Chemistry and Technology, Ministry of Education, College of  
Chemistry, Sichuan University, Chengdu, Sichuan, 610064, China.

Corresponding author: Tel/Fax: +86 28 85411105 (C. Hu)

E-mail: [chwehu@mail.sc.cninfo.net](mailto:chwehu@mail.sc.cninfo.net)

Contents

Fig. S1: XRD patterns of several fresh catalysts.

Fig. S2: TPR-H<sub>2</sub> profiles of several fresh catalysts.

Fig. S3: The tendency of CO<sub>2</sub> conversion on selected catalysts within 30 h.

Fig. S4: SEM images of the typical fresh catalysts.

Fig. S5: IR spectra of the typical used catalysts after 30 h reaction.

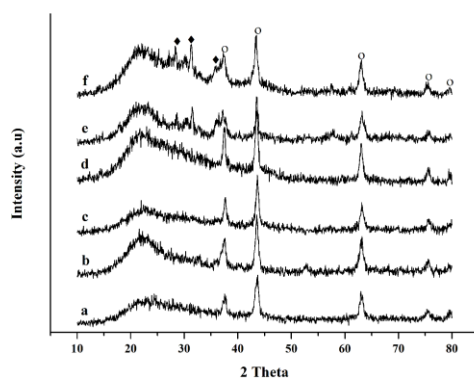

Fig. S1: XRD patterns of several fresh catalysts.  
a, Ni-Mg/SiO<sub>2</sub>-N; b, Mg/Ni/SiO<sub>2</sub>-N; c, Ni-Mg/SiO<sub>2</sub>-S;  
d, Mg/Ni/SiO<sub>2</sub>-S; e, Ni-Mg/SiO<sub>2</sub>-Cl; f, Mg/Ni/SiO<sub>2</sub>-Cl.  
(o): NiO; (♦): MgSiO<sub>3</sub>.

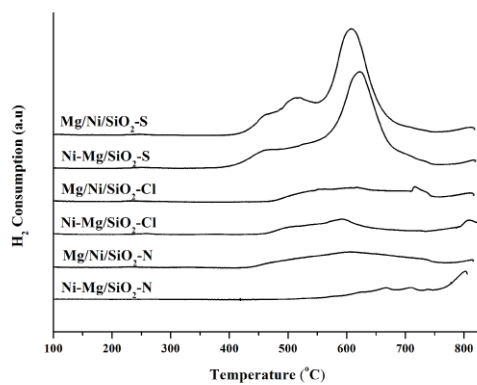

Fig. S2: TPR-H<sub>2</sub> profiles of several fresh catalysts.

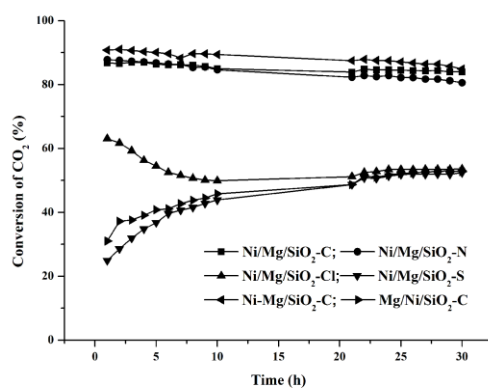

Fig. S3: The tendency of CO<sub>2</sub> conversion on selected catalysts within 30 h.

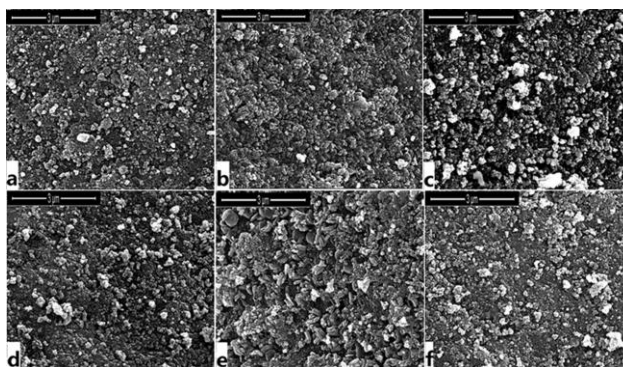

Fig. S4: SEM images of the typical fresh catalysts.

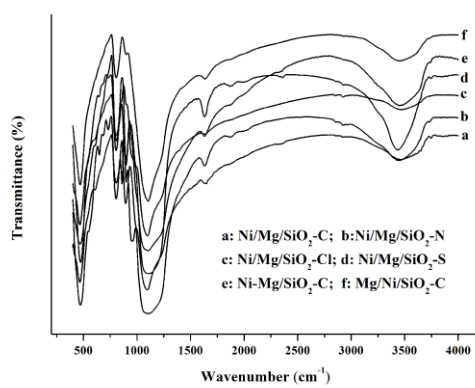

Fig. S5: IR spectra of the typical used catalysts after 30 h reaction.
